# Supplementary material
Source: PubMed Central journal article supplement (PMC1636549)

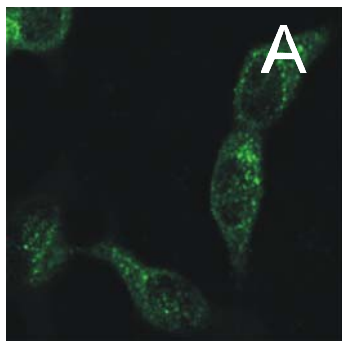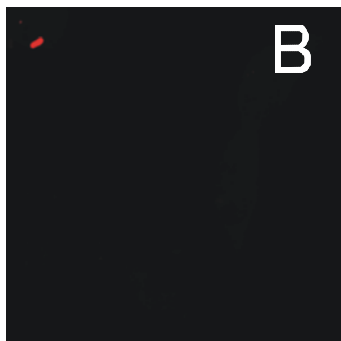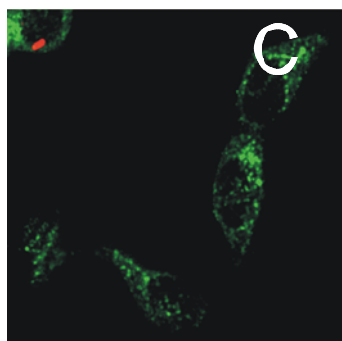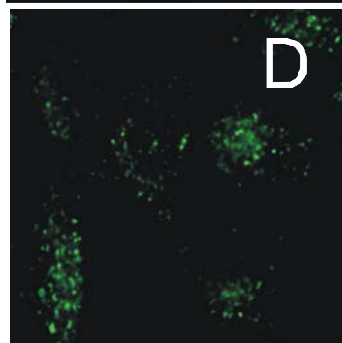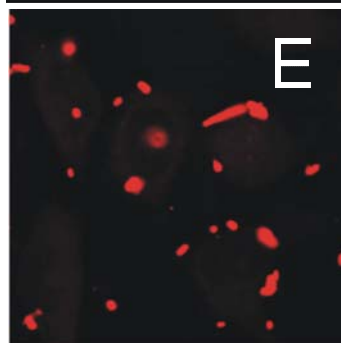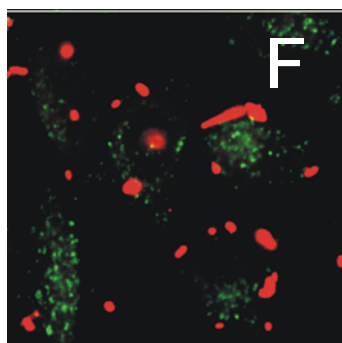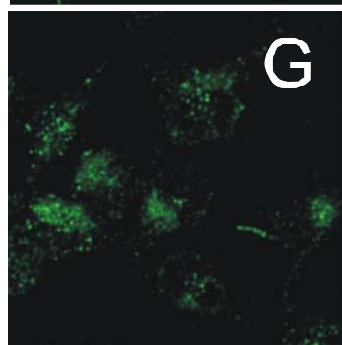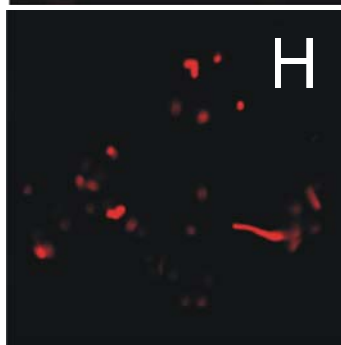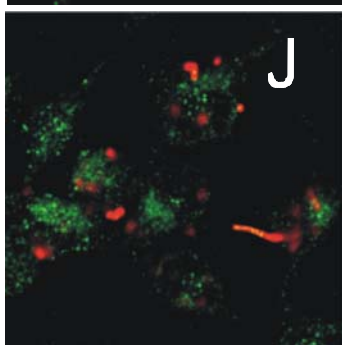

Supplement: pnas_0602126103_2.pdf [file pnas_0602126103_2.pdf]

Alexa 488-K12 *E. coli* (arbitrary units)

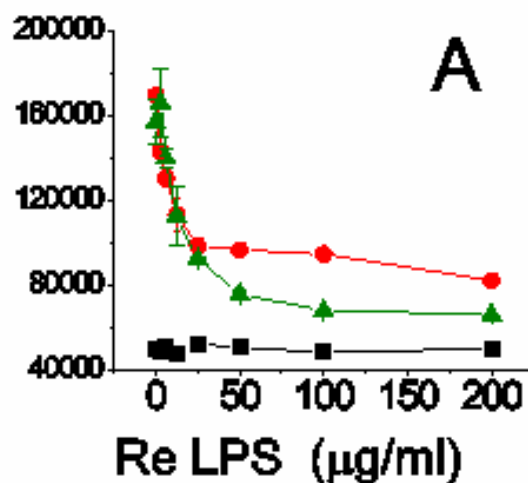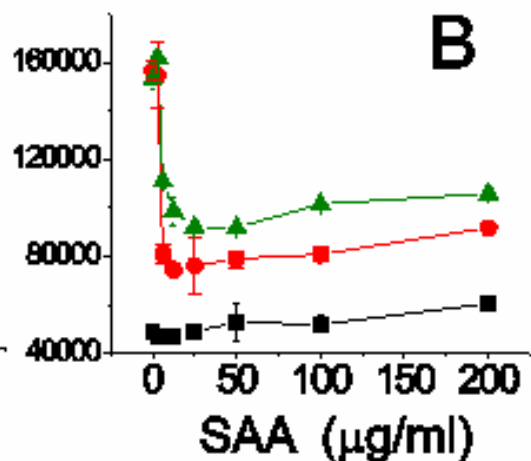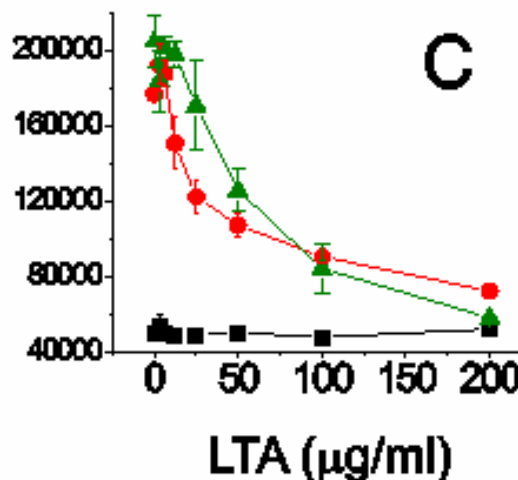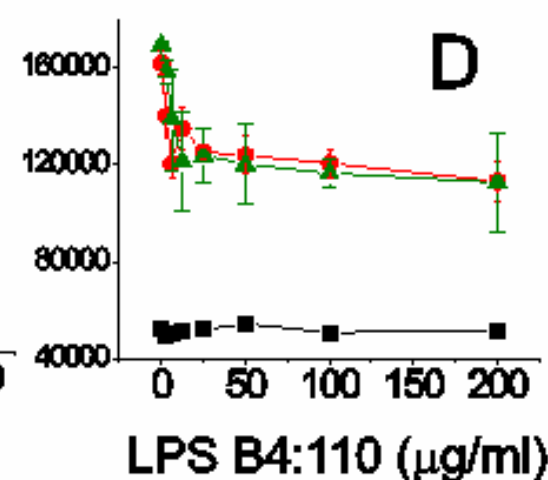

Supplement: pnas_0602126103_7.pdf [file pnas_0602126103_7.pdf]
